# Supplementary material for: Assessing Drought Tolerance in a Large Number of Upland Cotton Plants (Gossypium hirsutum L.) under Different Irrigation Regimes at the Seedling Stage
Source: MDPI journal article supplement (doi:10.3390/life13102067), 2023-10-16
Supplement: s1 [file s1]

**Supplementary Table S1.** Drought morphological markers mean in Upland cotton (*Gossypium hirsutum* L.) at the seedling stage

| CODE | Genotypes | NLRs  | RL   | RFW   | RDW   | SL    | SFW   | SDW   |
|------|-----------|-------|------|-------|-------|-------|-------|-------|
| G1   | 14        | 12.67 | 8    | 0.446 | 0.037 | 15.33 | 1.585 | 0.183 |
| G2   | 15        | 17.33 | 10   | 0.170 | 0.049 | 10.33 | 0.716 | 0.156 |
| G3   | 17        | 22.33 | 19.3 | 0.182 | 0.050 | 12.33 | 1.596 | 0.253 |
| G4   | 18        | 12.67 | 14.3 | 0.228 | 0.057 | 9.67  | 0.947 | 0.078 |
| G5   | 19        | 29.33 | 24.3 | 0.240 | 0.127 | 10.67 | 1.142 | 0.171 |
| G6   | 21        | 20.67 | 21.0 | 0.282 | 0.083 | 11.33 | 1.387 | 0.152 |
| G7   | 22        | 12.67 | 7.3  | 0.151 | 0.043 | 10.67 | 1.341 | 0.152 |
| G8   | 23        | 17.00 | 14.7 | 0.227 | 0.045 | 15.00 | 1.327 | 0.156 |
| G9   | 24        | 16.67 | 20.7 | 0.330 | 0.080 | 14.33 | 1.263 | 0.150 |
| G10  | 26        | 22.33 | 22.7 | 0.332 | 0.083 | 12.33 | 1.602 | 0.144 |
| G11  | 27        | 18.00 | 13.3 | 0.264 | 0.073 | 9.00  | 1.630 | 0.155 |
| G12  | 28        | 22.33 | 18.0 | 0.196 | 0.070 | 10.00 | 0.833 | 0.100 |
| G13  | 30        | 30.00 | 22.3 | 0.293 | 0.060 | 9.33  | 1.111 | 0.180 |
| G14  | 31        | 8.67  | 5.7  | 0.145 | 0.039 | 14.33 | 1.700 | 0.185 |
| G15  | 37        | 18.33 | 12.7 | 0.198 | 0.029 | 16.67 | 1.853 | 0.228 |
| G16  | 69        | 18.67 | 16.3 | 0.305 | 0.080 | 15.00 | 1.399 | 0.145 |
| G17  | ADN 513   | 14.67 | 13.0 | 0.252 | 0.072 | 13.00 | 1.433 | 0.153 |
| G18  | ADN123    | 14.67 | 9.3  | 0.198 | 0.042 | 12.67 | 1.510 | 0.165 |
| G19  | ADN413    | 22.33 | 11.3 | 0.250 | 0.057 | 8.00  | 1.008 | 0.108 |
| G20  | ADN710    | 16.33 | 10.7 | 0.187 | 0.024 | 15.67 | 0.809 | 0.078 |
| G21  | ADN741    | 23.00 | 14.7 | 0.255 | 0.052 | 12.33 | 1.250 | 0.153 |
| G22  | ADN811    | 23.33 | 16.0 | 0.333 | 0.070 | 7.33  | 0.885 | 0.081 |
| G23  | ARAS1     | 20.00 | 13.7 | 0.315 | 0.075 | 11.00 | 1.394 | 0.160 |
| G24  | ARAS2     | 25.67 | 21.7 | 0.378 | 0.072 | 10.67 | 1.168 | 0.162 |
| G25  | ARAS3     | 13.00 | 9.3  | 0.228 | 0.057 | 14.33 | 1.496 | 0.151 |
| G26  | ARAS4     | 19.00 | 17.7 | 0.275 | 0.077 | 12.67 | 1.381 | 0.124 |
| G27  | ARAS5     | 15.00 | 12.3 | 0.233 | 0.040 | 14.00 | 1.310 | 0.135 |
| G28  | ARAS6     | 21.67 | 16.3 | 0.286 | 0.068 | 10.67 | 1.298 | 0.301 |
| G29  | ARAS7     | 13.33 | 13.0 | 0.237 | 0.037 | 16.67 | 1.323 | 0.172 |
| G30  | ARAS8     | 21.67 | 19.3 | 0.290 | 0.066 | 16.00 | 1.591 | 0.108 |
| G31  | ARAS9     | 10.00 | 10.3 | 0.232 | 0.060 | 15.67 | 1.752 | 0.172 |
| G32  | ARAS10    | 24.00 | 19.7 | 0.314 | 0.085 | 7.33  | 0.784 | 0.154 |
| G33  | ARAS11    | 20.67 | 15.0 | 0.318 | 0.075 | 13.67 | 1.537 | 0.175 |
| G34  | ARAS12    | 12.33 | 12.3 | 0.271 | 0.074 | 12.33 | 1.465 | 0.159 |
| G35  | ARAS13    | 7.33  | 5.7  | 0.140 | 0.021 | 18.33 | 1.466 | 0.349 |
| G36  | ARAS14    | 23.00 | 17.0 | 0.380 | 0.062 | 11.67 | 1.441 | 0.149 |
| G37  | ARAS15    | 18.67 | 13.7 | 0.224 | 0.035 | 13.00 | 1.343 | 0.176 |
| G38  | ARAS16    | 18.33 | 14.7 | 0.269 | 0.063 | 12.33 | 1.347 | 0.127 |
| G39  | ARAS17    | 14.33 | 14.7 | 0.324 | 0.035 | 13.67 | 1.391 | 0.165 |
| G40  | ARAS18    | 12.67 | 8.7  | 0.208 | 0.080 | 9.67  | 1.395 | 0.131 |
| G41  | ARAS19    | 4.33  | 5.3  | 0.136 | 0.047 | 13.67 | 1.736 | 0.314 |
| G42  | ARAS20    | 12.67 | 11.3 | 0.220 | 0.052 | 13.00 | 1.402 | 0.125 |

|     |               |       |      |       |       |       |       |       |
|-----|---------------|-------|------|-------|-------|-------|-------|-------|
| G43 | ARAS23        | 18.00 | 13.3 | 0.234 | 0.061 | 12.67 | 1.407 | 0.153 |
| G44 | ARAS24        | 38.00 | 25.7 | 0.424 | 0.099 | 9.67  | 1.376 | 0.249 |
| G45 | ARAS26        | 27.33 | 16.7 | 0.260 | 0.065 | 14.00 | 1.144 | 0.133 |
| G46 | ARAS27        | 28.00 | 14.0 | 0.211 | 0.039 | 14.67 | 1.336 | 0.135 |
| G47 | ARAS31        | 5.00  | 7.7  | 0.148 | 0.050 | 14.00 | 1.724 | 0.195 |
| G48 | ARAS32        | 16.67 | 12.0 | 0.228 | 0.067 | 13.67 | 1.423 | 0.137 |
| G49 | ARAS33        | 29.00 | 13.3 | 0.255 | 0.082 | 14.00 | 1.479 | 0.156 |
| G50 | ARAS34        | 16.00 | 12.3 | 0.314 | 0.067 | 9.67  | 1.054 | 0.094 |
| G51 | ARAS35        | 25.00 | 20.3 | 0.397 | 0.039 | 13.67 | 1.572 | 0.148 |
| G52 | ARAS43        | 19.67 | 18.3 | 0.232 | 0.072 | 14.33 | 1.815 | 0.345 |
| G53 | ARAS48        | 24.33 | 18.0 | 0.314 | 0.081 | 12.00 | 1.325 | 0.150 |
| G54 | ASOS          | 21.67 | 9.3  | 0.224 | 0.053 | 9.67  | 1.136 | 0.134 |
| G55 | Aşkabat 71    | 14.33 | 12.0 | 0.233 | 0.031 | 15.33 | 1.560 | 0.139 |
| G56 | BA119         | 32.00 | 27.0 | 0.427 | 0.112 | 15.67 | 1.634 | 0.162 |
| G57 | BA151         | 17.67 | 12.7 | 0.224 | 0.036 | 11.67 | 1.489 | 0.337 |
| G58 | Beren         | 24.00 | 10.7 | 0.190 | 0.039 | 9.33  | 1.272 | 0.172 |
| G59 | DeltaPine 332 | 23.00 | 13.7 | 0.213 | 0.029 | 15.33 | 0.972 | 0.104 |
| G60 | DeltaPine 396 | 14.51 | 18.4 | 0.315 | 0.039 | 14.12 | 1.805 | 0.294 |
| G61 | Erşan92       | 17.00 | 8.3  | 0.179 | 0.026 | 14.33 | 1.537 | 0.219 |
| G62 | Famosa        | 12.00 | 10.0 | 0.205 | 0.031 | 11.33 | 0.903 | 0.094 |
| G63 | Fiona         | 17.67 | 16.0 | 0.271 | 0.056 | 11.33 | 1.131 | 0.102 |
| G64 | Furkan        | 23.67 | 19.0 | 0.339 | 0.044 | 11.00 | 0.895 | 0.151 |
| G65 | Gaia          | 24.00 | 12.3 | 0.288 | 0.074 | 8.33  | 1.262 | 0.060 |
| G66 | Kartanesi     | 16.67 | 14.7 | 0.238 | 0.037 | 14.00 | 1.312 | 0.289 |
| G67 | Lydia         | 16.00 | 9.0  | 0.210 | 0.030 | 15.83 | 1.468 | 0.203 |
| G68 | Maraş 92      | 12.33 | 13.0 | 0.259 | 0.033 | 12.67 | 1.691 | 0.252 |
| G69 | May 344       | 14.33 | 13.7 | 0.253 | 0.039 | 11.67 | 1.157 | 0.131 |
| G70 | Maysos        | 18.67 | 12.3 | 0.228 | 0.028 | 15.57 | 1.347 | 0.156 |
| G71 | Nihal         | 13.33 | 14.7 | 0.222 | 0.043 | 12.00 | 1.365 | 0.159 |
| G72 | SC-125        | 25.33 | 18.7 | 0.351 | 0.075 | 7.33  | 1.052 | 0.110 |
| G73 | SC-21         | 14.00 | 7.3  | 0.178 | 0.038 | 12.67 | 1.435 | 0.204 |
| G74 | SC-22         | 13.00 | 8.3  | 0.187 | 0.036 | 15.33 | 1.289 | 0.160 |
| G75 | SC-24         | 23.00 | 15.7 | 0.322 | 0.092 | 9.00  | 0.739 | 0.091 |
| G76 | SC-25         | 6.33  | 5.3  | 0.123 | 0.016 | 16.33 | 1.492 | 0.205 |
| G77 | SC-28         | 25.67 | 15.7 | 0.275 | 0.047 | 15.33 | 1.362 | 0.151 |
| G78 | SC-29         | 24.33 | 16.3 | 0.308 | 0.075 | 11.00 | 1.341 | 0.124 |
| G79 | SC-30         | 7.00  | 7.3  | 0.159 | 0.030 | 15.67 | 1.499 | 0.141 |
| G80 | SC-36         | 24.33 | 13.0 | 0.251 | 0.059 | 12.67 | 1.308 | 0.162 |
| G81 | SC-37         | 19.00 | 13.7 | 0.324 | 0.055 | 12.67 | 1.284 | 0.158 |
| G82 | SC-38         | 16.00 | 11.7 | 0.227 | 0.035 | 13.67 | 1.375 | 0.172 |
| G83 | SC-39         | 25.33 | 14.7 | 0.222 | 0.062 | 9.00  | 0.686 | 0.161 |
| G84 | SC-41         | 26.33 | 18.0 | 0.266 | 0.054 | 14.67 | 1.443 | 0.160 |
| G85 | SC-42         | 25.33 | 12.0 | 0.310 | 0.088 | 13.33 | 1.568 | 0.149 |
| G86 | STV373        | 33.00 | 23.7 | 0.411 | 0.083 | 9.67  | 1.301 | 0.167 |
| G87 | STV468        | 22.67 | 15.3 | 0.253 | 0.050 | 12.00 | 1.179 | 0.146 |

|     |              |       |       |       |       |       |       |       |
|-----|--------------|-------|-------|-------|-------|-------|-------|-------|
| G88 | STV498       | 23.67 | 19.3  | 0.384 | 0.072 | 7.67  | 1.090 | 0.125 |
| G89 | Suregrow 125 | 26.33 | 20.3  | 0.321 | 0.064 | 13.00 | 1.231 | 0.112 |
| G90 | Text         | 21.00 | 15.7  | 0.350 | 0.091 | 9.67  | 1.039 | 0.087 |
| G91 | TMN 199      | 26.00 | 17.3  | 0.314 | 0.078 | 6.33  | 0.770 | 0.078 |
| G92 | TMN108       | 18.00 | 13.0  | 0.196 | 0.032 | 14.00 | 1.639 | 0.233 |
| G93 | TMS 108      | 14.67 | 9.3   | 0.201 | 0.058 | 11.67 | 1.444 | 0.170 |
|     | Means:       | 19.16 | 14.27 | 0.26  | 0.06  | 12.47 | 1.33  | 0.16  |

**Abbreviations**=Number of lateral roots (NLRs), Root length (RL), Root fresh weight (RFW), Root dry weight (RDW), Shoot length (SL), Shoot fresh weight (SFW), Shoot dry weight (SDW)
